# Supplementary material for: Application and Effects of Ohmic-Vacuum Combination Heating on the Quality Factors of Tomato Paste
Source: MDPI journal article supplement (doi:10.3390/foods10122920), 2021-11-25
Supplement: s1 [file s1]

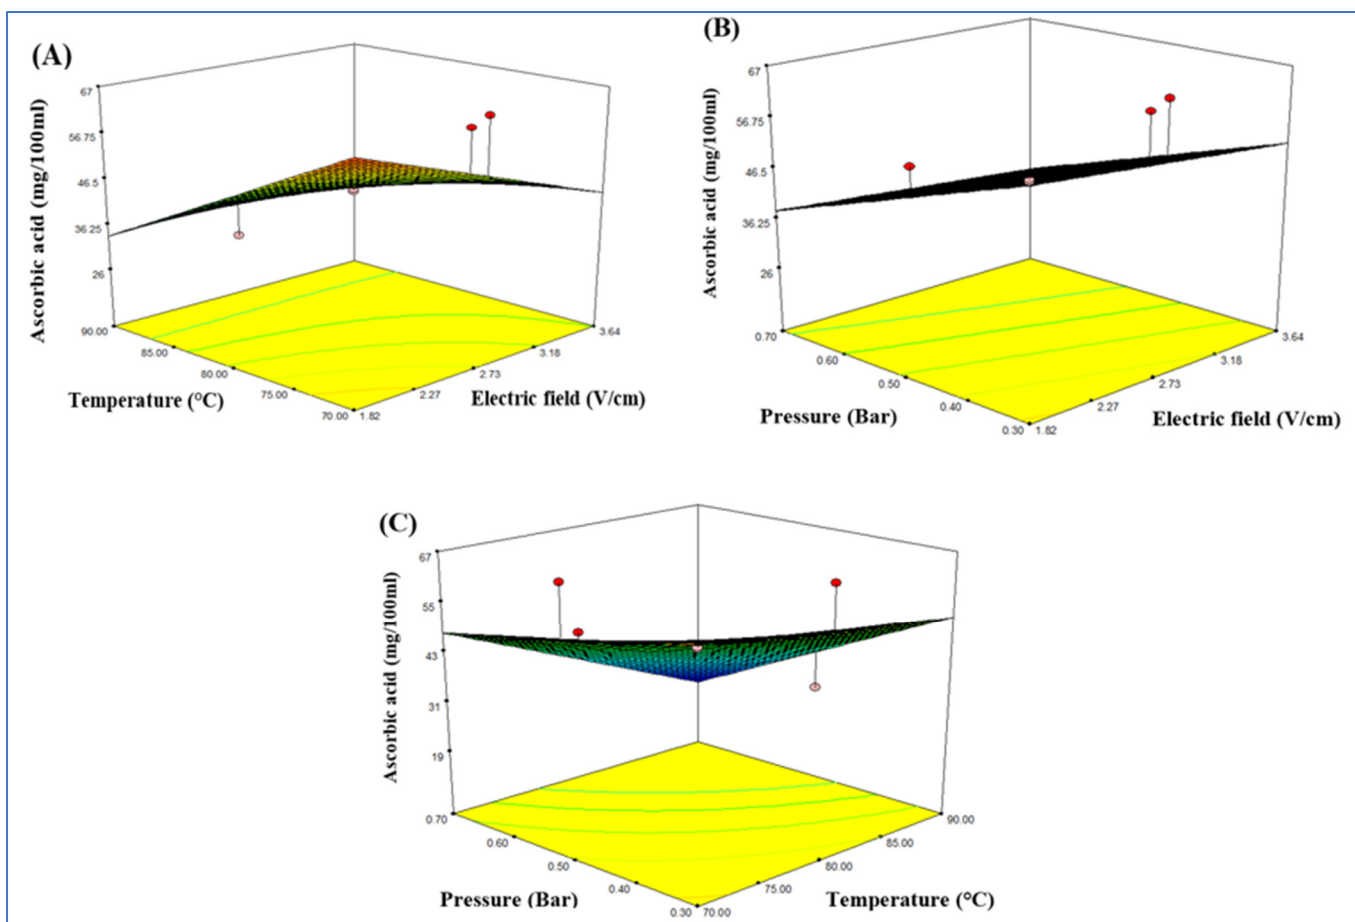

**Figure S1.** Response surface model plot showing the effects of independent variables on the ascorbic acid (mg/100 ml sample): panel A temperature and electric field; panel B pressure and electric field; and panel temperature and pressure.

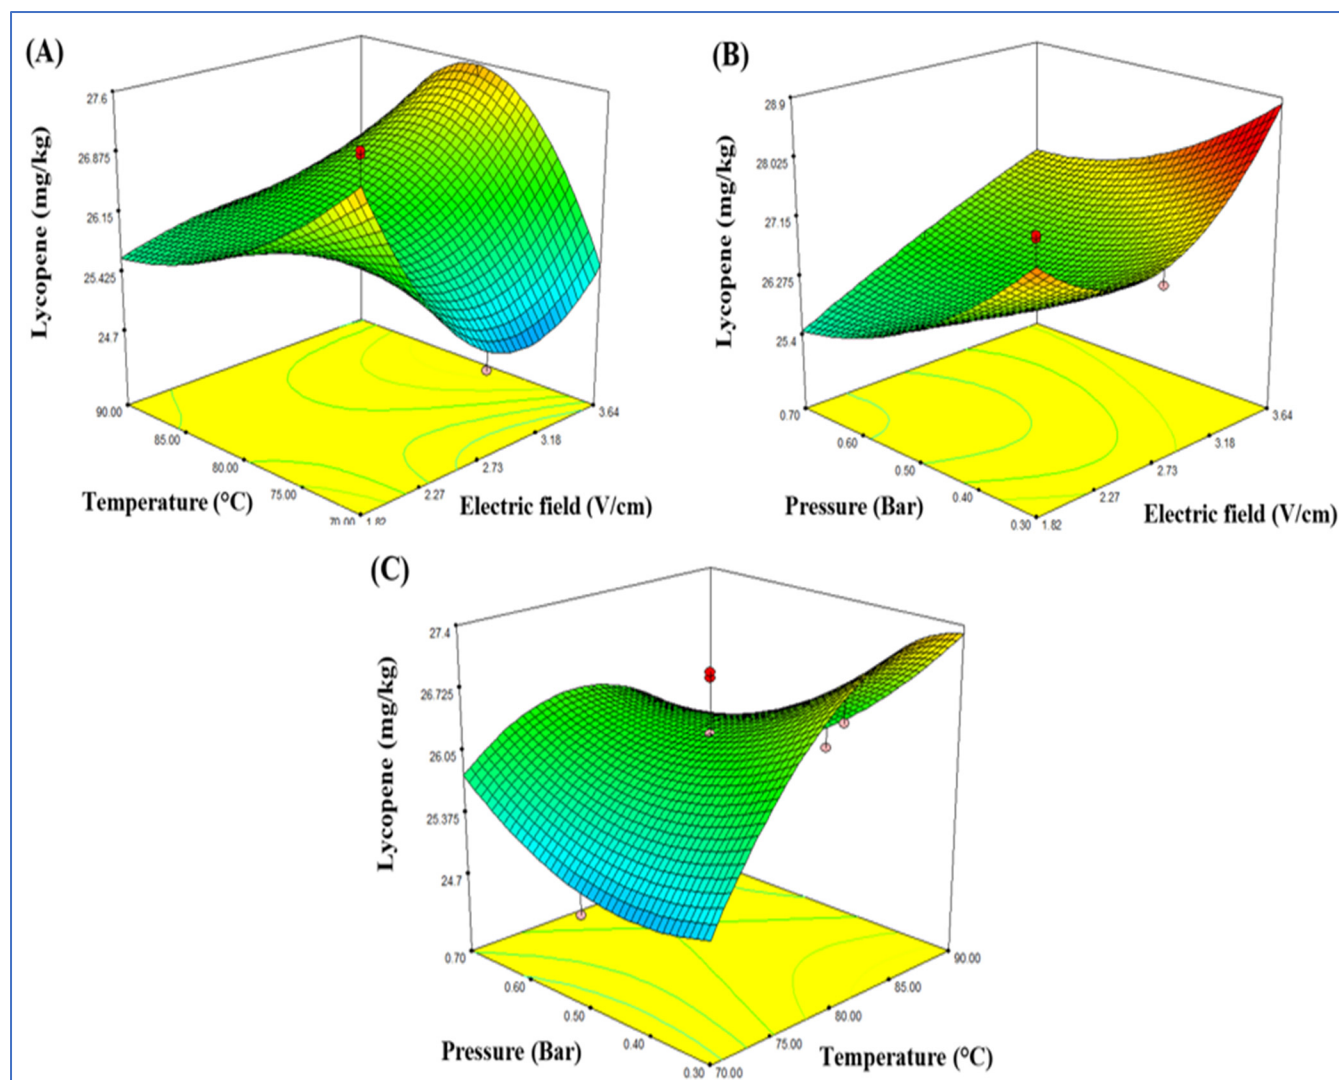

**Figure S2.** Response surface model plot showing the effects of independent variables on the lycopene content (mg/kg): panel A temperature and electric field; panel B pressure and electric field; and panel temperature and pressure.

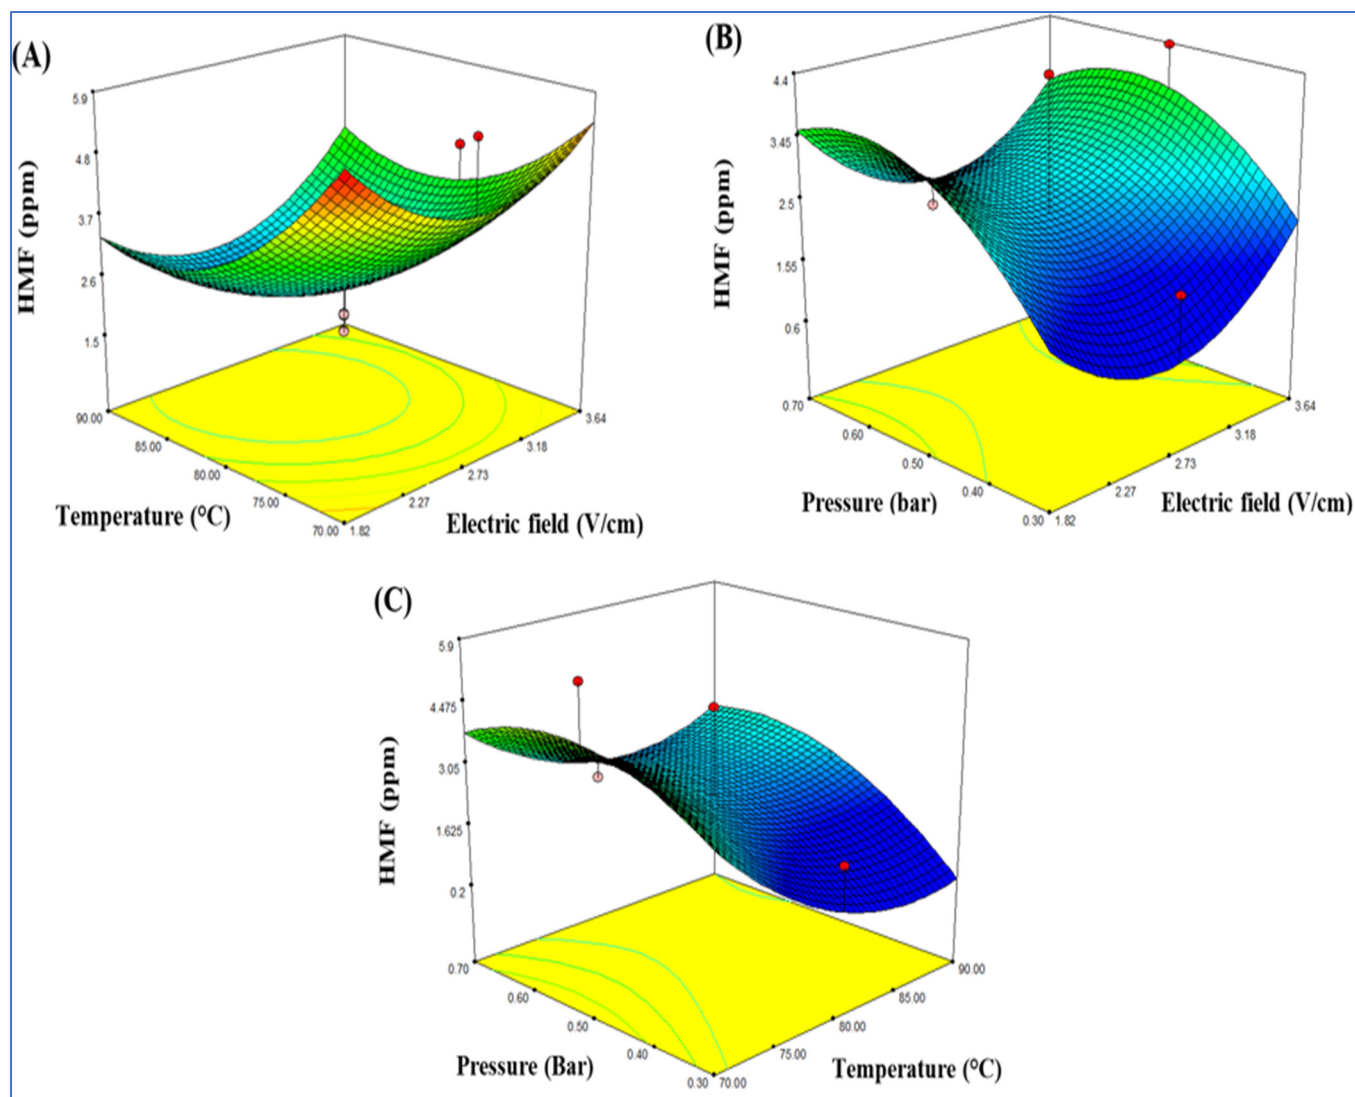

**Figure S3.** Response surface model plot showing the effects of independent variables on HMF (ppm): panel A temperature and electric field; panel B pressure and electric field; and panel temperature and pressure.

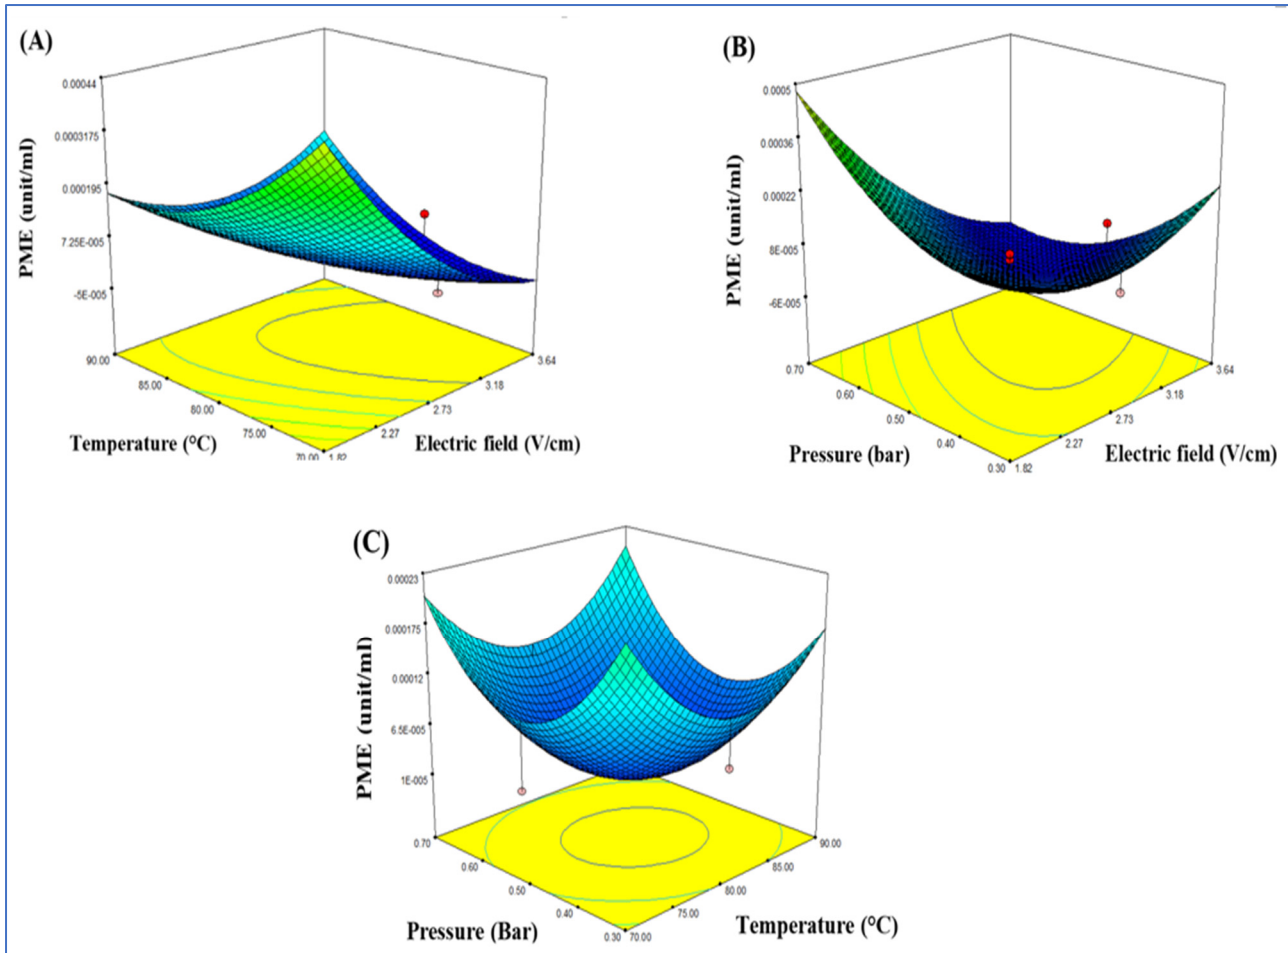

**Figure S4.** Response surface model plot showing the effects of independent variables on PME (unit/ml): panel A temperature and electric field; panel B pressure and electric field; and panel temperature and pressure.

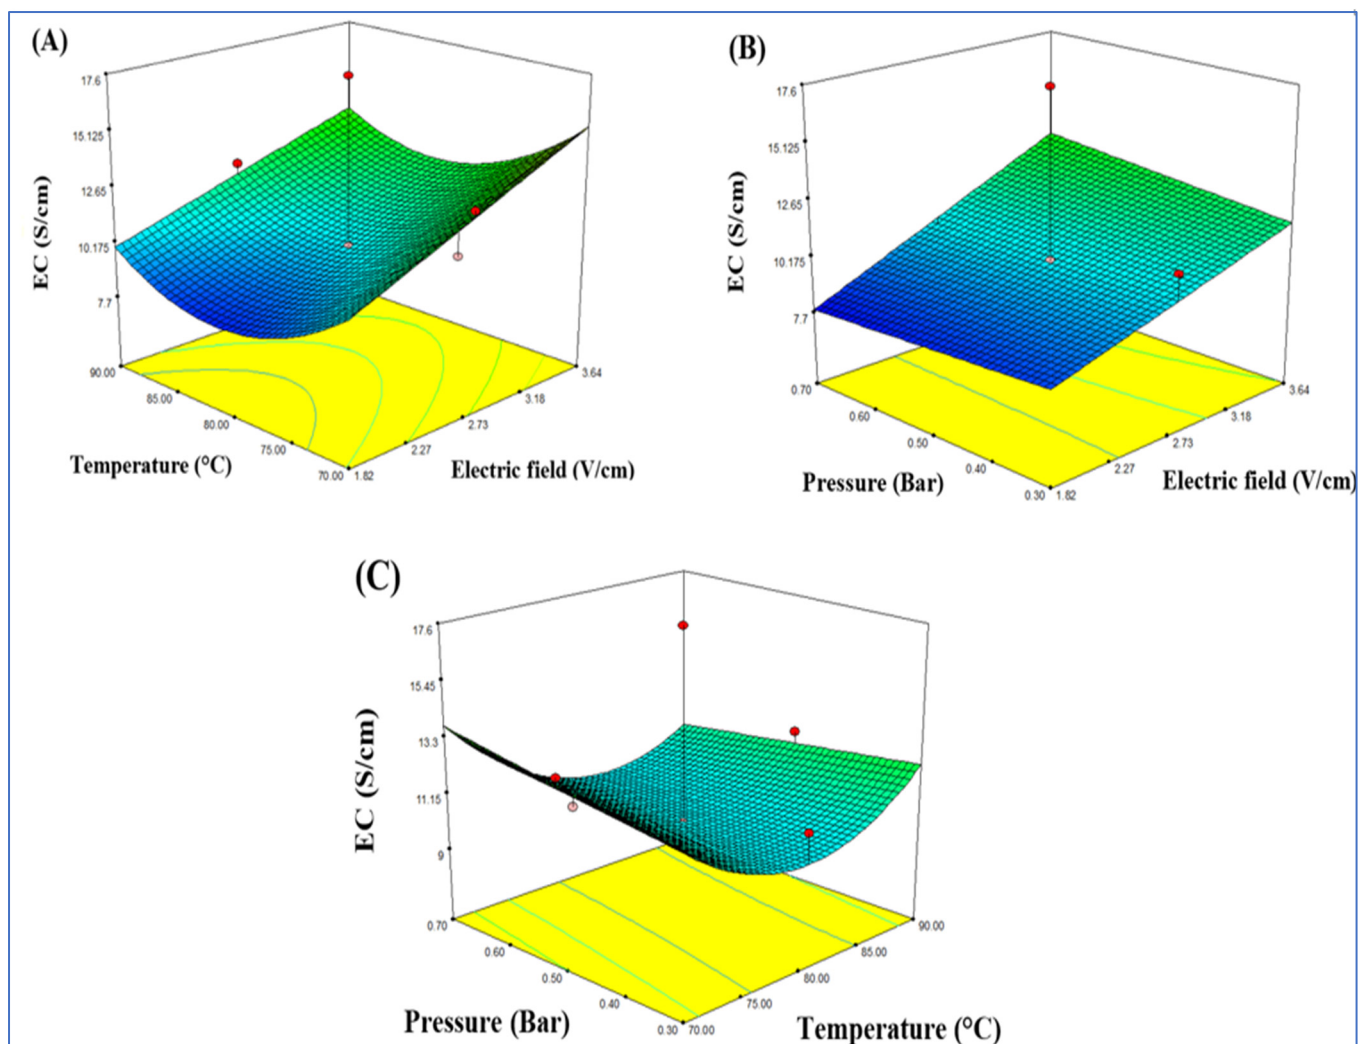

**Figure S5.** Response surface model plot showing the effects of independent variables on EC (S/cm): panel A temperature and electric field; panel B pressure and electric field; and panel temperature and pressure.

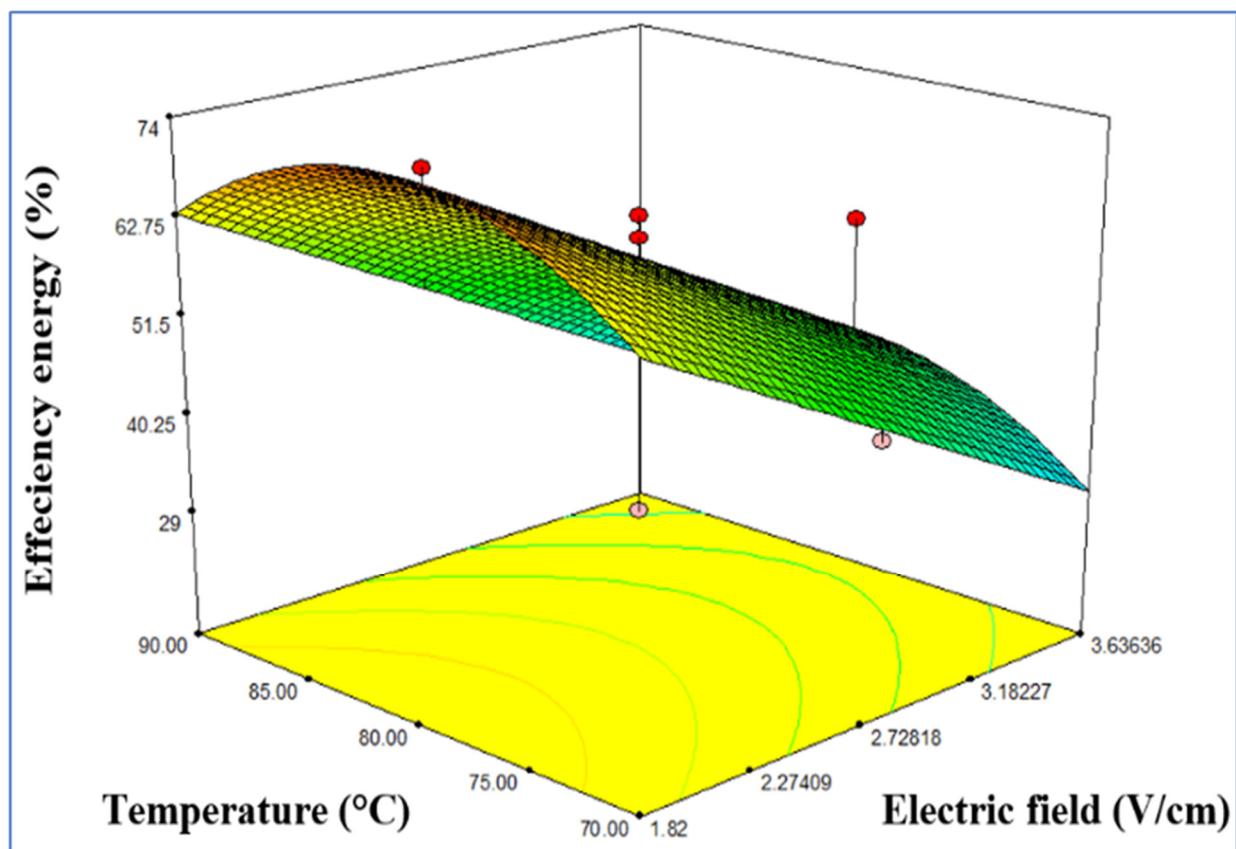

**Figure S6.** Response surface model plot showing the effects of independent variables on the energy efficiency (%)

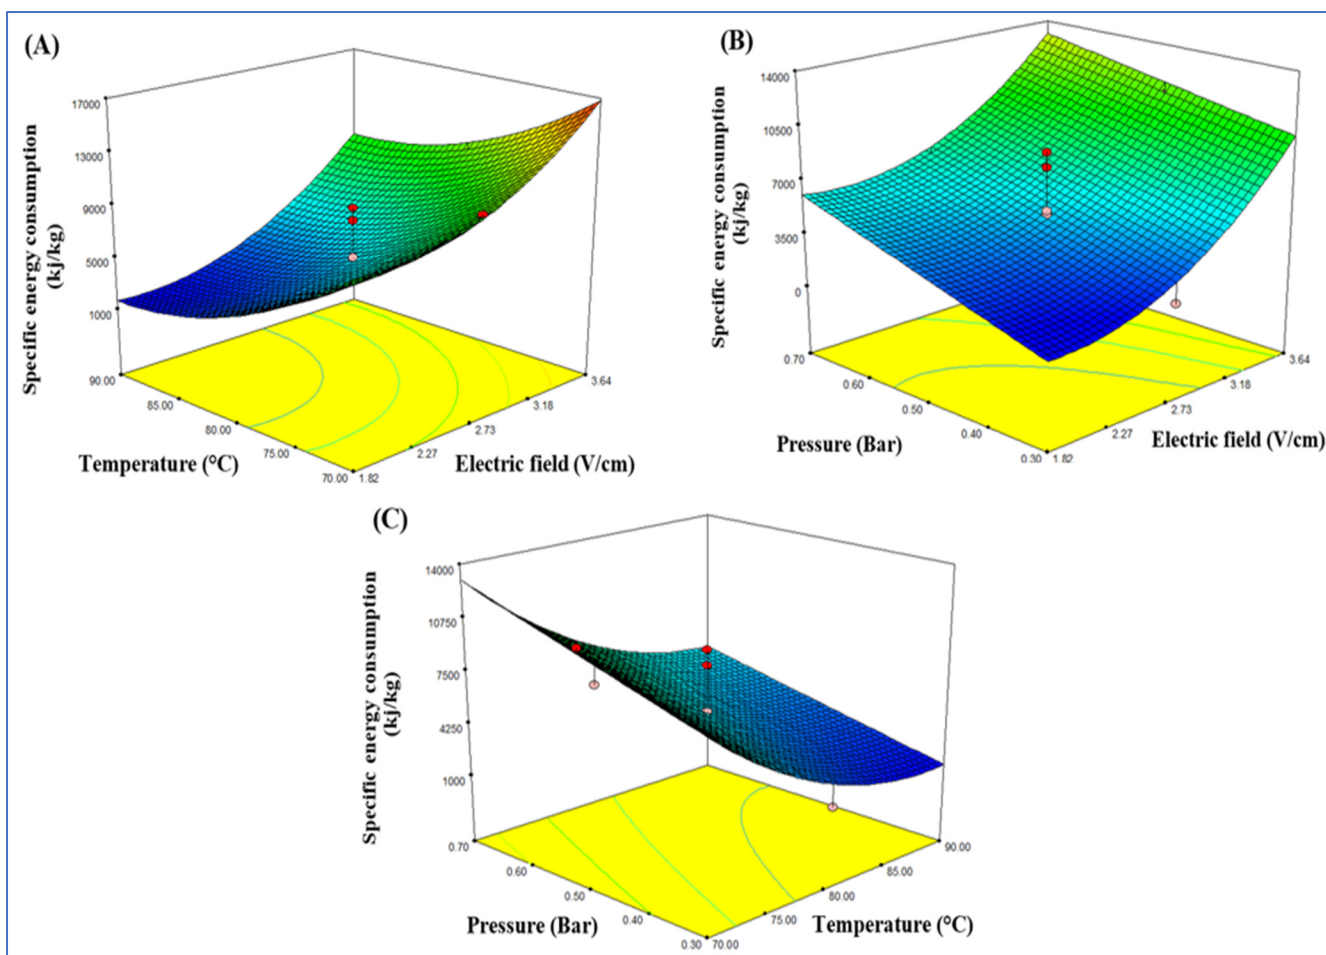

**Figure S7.** Response surface model plot showing the effects of independent variables on SEC (kJ/kg): panel A temperature and electric field; panel B pressure and electric field; and panel temperature and pressure.



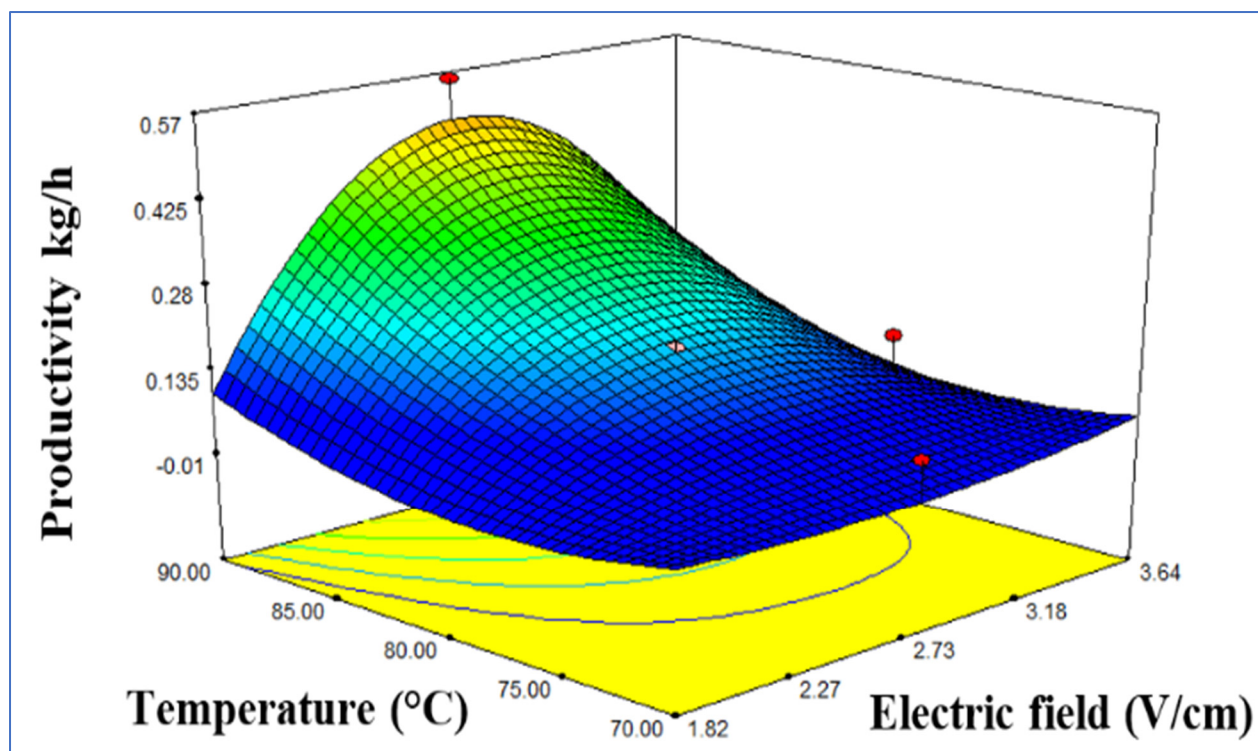

**Figure S8.** Response surface model plot showing the effects of independent variables on the productivity (kg/h)

**Table S1.** Experimental design and responses of electrical conductivity (S/m), Efficiency (%), Specific energy consumption (kJ/kg), and Productivity (Kg/h)

| RUN | Independent variables |                  |                | Electrical conductivity | Effeciency | Specific energy consumption | Productivity |
|-----|-----------------------|------------------|----------------|-------------------------|------------|-----------------------------|--------------|
|     | Electric field (V/cm) | Temperature (°C) | pressure (Bar) |                         |            |                             |              |
| 1   | 1.82                  | 70               | 0.7            | 10.1585                 | 53.5567    | 15042.9                     | 0.08156      |
| 2   | 3.64                  | 90               | 0.3            | 14.2513                 | 18.4441    | 6302.34                     | 0.314583     |
| 3   | 3.64                  | 90               | 0.7            | 13.7188                 | 29.0105    | 14778.5                     | 0.131667     |
| 4   | 3.64                  | 70               | 0.3            | 13.8958                 | 38.8024    | 17479.9                     | 0.106345     |
| 5   | 2.73                  | 70               | 0.5            | 13.2659                 | 45.4181    | 10943.9                     | 0.091084     |



|    |      |    |     |         |         |         |          |
|----|------|----|-----|---------|---------|---------|----------|
| 6  | 2.73 | 80 | 0.5 | 17.5178 | 29.0546 | 8853.33 | 0.147573 |
| 7  | 2.73 | 80 | 0.5 | 9.68208 | 63.0713 | 7887.58 | 0.091205 |
| 8  | 3.64 | 70 | 0.7 | 17.8275 | 26.6385 | 16107.6 | 0.13945  |
| 9  | 2.73 | 80 | 0.5 | 10.0174 | 60.5941 | 5025.5  | 0.153346 |
| 10 | 1.82 | 90 | 0.3 | 9.53871 | 65.7436 | 2502.1  | 0.114129 |
| 11 | 1.82 | 80 | 0.5 | 8.45029 | 69.8637 | 3018.9  | 0.088757 |
| 12 | 3.64 | 80 | 0.5 | 7.74051 | 56.2944 | 10645.3 | 0.09775  |
| 13 | 1.82 | 90 | 0.7 | 8.97704 | 64.2679 | 1554.79 | 0.19075  |
| 14 | 2.73 | 90 | 0.5 | 12.2025 | 62.3614 | 1682.84 | 0.558571 |
| 15 | 2.73 | 80 | 0.7 | 9.09792 | 79.7121 | 4567.7  | 0.139065 |
| 16 | 2.73 | 80 | 0.3 | 11.2355 | 62.6228 | 1576.82 | 0.542759 |
| 17 | 1.82 | 70 | 0.3 | 9.76251 | 69.1906 | 3223.96 | 0.103087 |
| 18 | 2.73 | 80 | 0.5 | 9.13039 | 55.6602 | 4756.64 | 0.148868 |
| 19 | 2.73 | 80 | 0.5 | 9.31516 | 52.8869 | 4299.75 | 0.175165 |
| 20 | 2.73 | 80 | 0.5 | 9.7508  | 54.2315 | 4914.3  | 0.139513 |

**Table S2.** Regression coefficients,  $R^2$ , and p values of the model for four dependent variables for ohmic-vacuum (OH-VC) combination heating samples

| Regression coefficient | #        |                   |                             |                   |
|------------------------|----------|-------------------|-----------------------------|-------------------|
|                        | EC       | Energy Efficiency | Specific energy consumption | Productivity Kg/h |
| $b_0$                  | 130.1054 | -608.118          | -12787.5                    | 11.24347          |
| $b_1$                  | 3.617486 | -16.8776          | 49814.05                    | -5.97621          |
| $b_2$                  | -3.27045 | 17.75147          | -1308.41                    | -0.25207          |
| $b_1b_2$               | 20.97356 | -0.11056          | 371357.8                    | 6.52143           |
| $b_1^2$                | -0.03228 | -                 | -753.961                    | 0.12892           |
| $b_2^2$                | 2.450765 | -                 | -126971                     | -6.4111           |

|                                      |          |          |          |           |
|--------------------------------------|----------|----------|----------|-----------|
| <b><math>b_1 b_2^2</math></b>        | -0.33887 | -        | -4422.62 | -7.37E-03 |
| <b><math>b_1^2 b_2</math></b>        | 0.021661 | -        | 2969.06  | 1.09664   |
| <b><math>R^2</math></b>              | 0.471579 | 0.570429 | 0.928574 | 0.8238    |
| <b>p-value of the model</b>          | 0.2469   | 0.0030   | 0.0001   | 0.0466    |
| <b><i>p</i>-value of lack of fit</b> | 0.8509   | 0.5812   | 0.4949   | 0.0019    |
